# Supplementary material
Source: Royal Society of Chemistry journal article supplement (doi:10.1039/d6ey00058d)
Supplement: d6ey00058d1.pdf [file d6ey00058d1.pdf]

# *Supplemental Information for*

## *NiFeCo-based Catalysts in High Current Zero-Gap*

### *Anion Exchange Membrane Water Electrolyzers*

*B. Milenia Rojas Mendoza<sup>1,2</sup>, Ryan T. Hannagan<sup>1,2,3</sup>, Sofia Kimuyu<sup>1</sup>, Colin F. Crago<sup>1,2</sup>, Alfred Vargas<sup>1,2</sup>, Ashton M. Aleman<sup>1,2</sup>, Johanna Schröder<sup>4</sup>, Daniela H. Marin<sup>1,2</sup>, Isabela Rios Amador<sup>1,2</sup>, Jaehyuk Shim<sup>1,2</sup>, Adam C. Nielander<sup>2</sup>, Michaela Burke Stevens<sup>2\*</sup>, Thomas F. Jaramillo<sup>1,2\*</sup>*

<sup>1</sup>Department of Chemical Engineering, Stanford University, 443 Via Ortega, Stanford, CA 94305, United States of America

<sup>2</sup>SUNCAT Center for Interface Science and Catalysis, SLAC National Accelerator Laboratory, 2575 Sand Hill Road, Menlo Park, CA 94025, United States of America

<sup>3</sup>Department of Chemical Sciences, Bridgewater State University, Bridgewater, MA 02325

<sup>4</sup>Institute for Chemical Technology and Polymer Chemistry (ITCP), Karlsruhe Institute of Technology (KIT), Engesserstrabe 18, 76131, Karlsruhe, Germany.

Corresponding Authors

\*Email: [mburkes@slac.stanford.edu](mailto:mburkes@slac.stanford.edu), [jaramillo@stanford.edu](mailto:jaramillo@stanford.edu)

#### **Table of Contents**

*Material Characterization* .....3

Figure S1: XPS depth profile of bimetallic and trimetallic thin films.....3  
 Figure S2. XRD patterns of PVD-deposited thin-film anode catalysts and reference standards. ...4  
 Figure S3. SEM images and EDS elemental maps of catalyst-coated PTLs and controls.....5  
 Figure S4. Electrochemical Schematic .....6  
*Additional Data* ..... 7  
 Figure S5. Pre- and post-24 h stability polarization curves in DI water-fed AEMWEs.....7  
 Figure S6. Quantified metal dissolution from anode catalyst layers after 24 h at 1 A cm<sup>-2</sup> in DI water. ....8  
 Figure S7. XPS of ionomer and catalyst surfaces before and after 24 h stability testing.....9  
 Figure S8. Raw galvanostatic electrochemical impedance spectroscopy (GEIS) Nyquist plots for each anode catalyst at 1 A cm<sup>-2</sup>. ....10

## Material Characterization

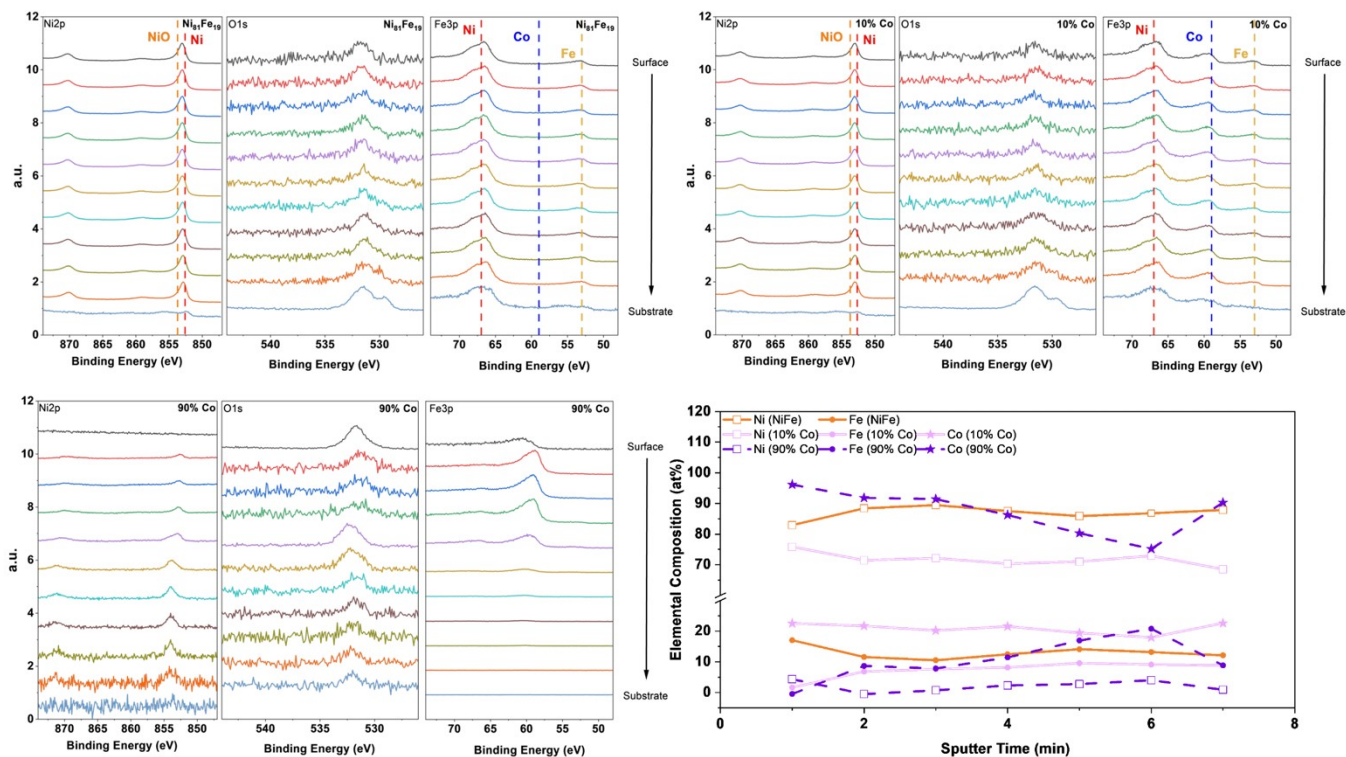

## Figure S1: XPS depth profile of bimetallic and trimetallic thin films

Panels (a–c) show stacked spectra of the Ni 2p (left), O 1s (center) and Fe 3p (right) regions after successive Ar<sup>+</sup> sputter intervals (surface at top, substrate at bottom) for: a) Ni<sub>81</sub>Fe<sub>19</sub>, b) (Ni<sub>81</sub>Fe<sub>19</sub>)<sub>90</sub>Co<sub>10</sub>, and c) (Ni<sub>81</sub>Fe<sub>19</sub>)<sub>10</sub>Co<sub>90</sub>. Dashed red lines mark the Ni<sup>0</sup>/Ni<sup>2+</sup> peaks in Ni 2p, dashed yellow lines the O 1s oxide peak, and dashed blue (Fe 3p) and orange (Fe 3p satellite) lines the iron signals. d) Quantified at.% of Ni, Fe and Co extracted from the Fe 3p and Ni 2p peaks as a function of sputter time for all three alloys, demonstrating that each film maintains its target composition ( $\sim\pm 10\%$ ) throughout the  $\sim 100$  nm thickness.

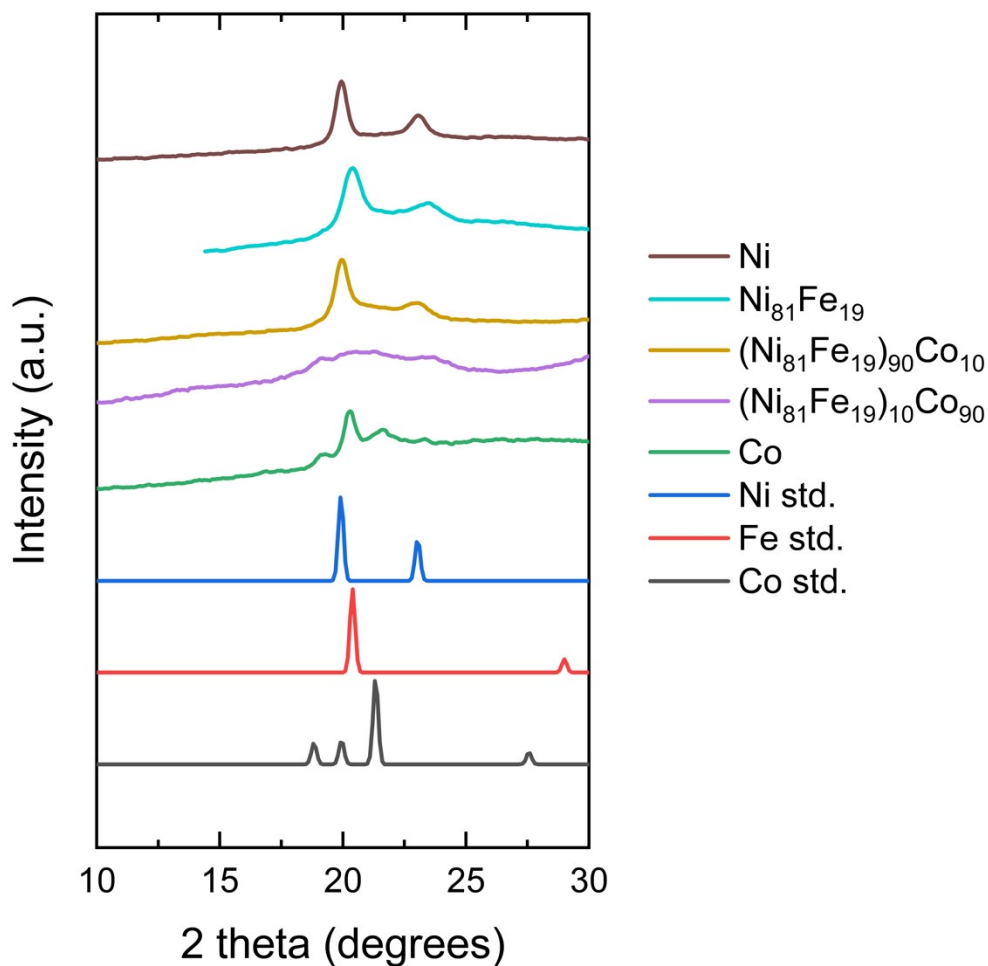

## Figure S2. XRD patterns of PVD-deposited thin-film anode catalysts and reference standards.

Diffraction traces for 100 nm Ni (brown), Ni<sub>81</sub>Fe<sub>19</sub> (cyan), (Ni<sub>81</sub>Fe<sub>19</sub>)<sub>90</sub>Co<sub>10</sub> (gold), (Ni<sub>81</sub>Fe<sub>19</sub>)<sub>10</sub>Co<sub>90</sub> (purple), and 100 nm Co (green) alongside ICSD metallic standards for Ni (blue, ICSD 125671), Fe (red, ICSD 14754), and Co (grey, ICSD 36677). All compositions exhibit

primarily FCC metal peaks: Ni-rich films align with the Ni reference, Co-rich films align with Co, and intermediate alloys display peak shifts and broadening consistent with alloy formation.

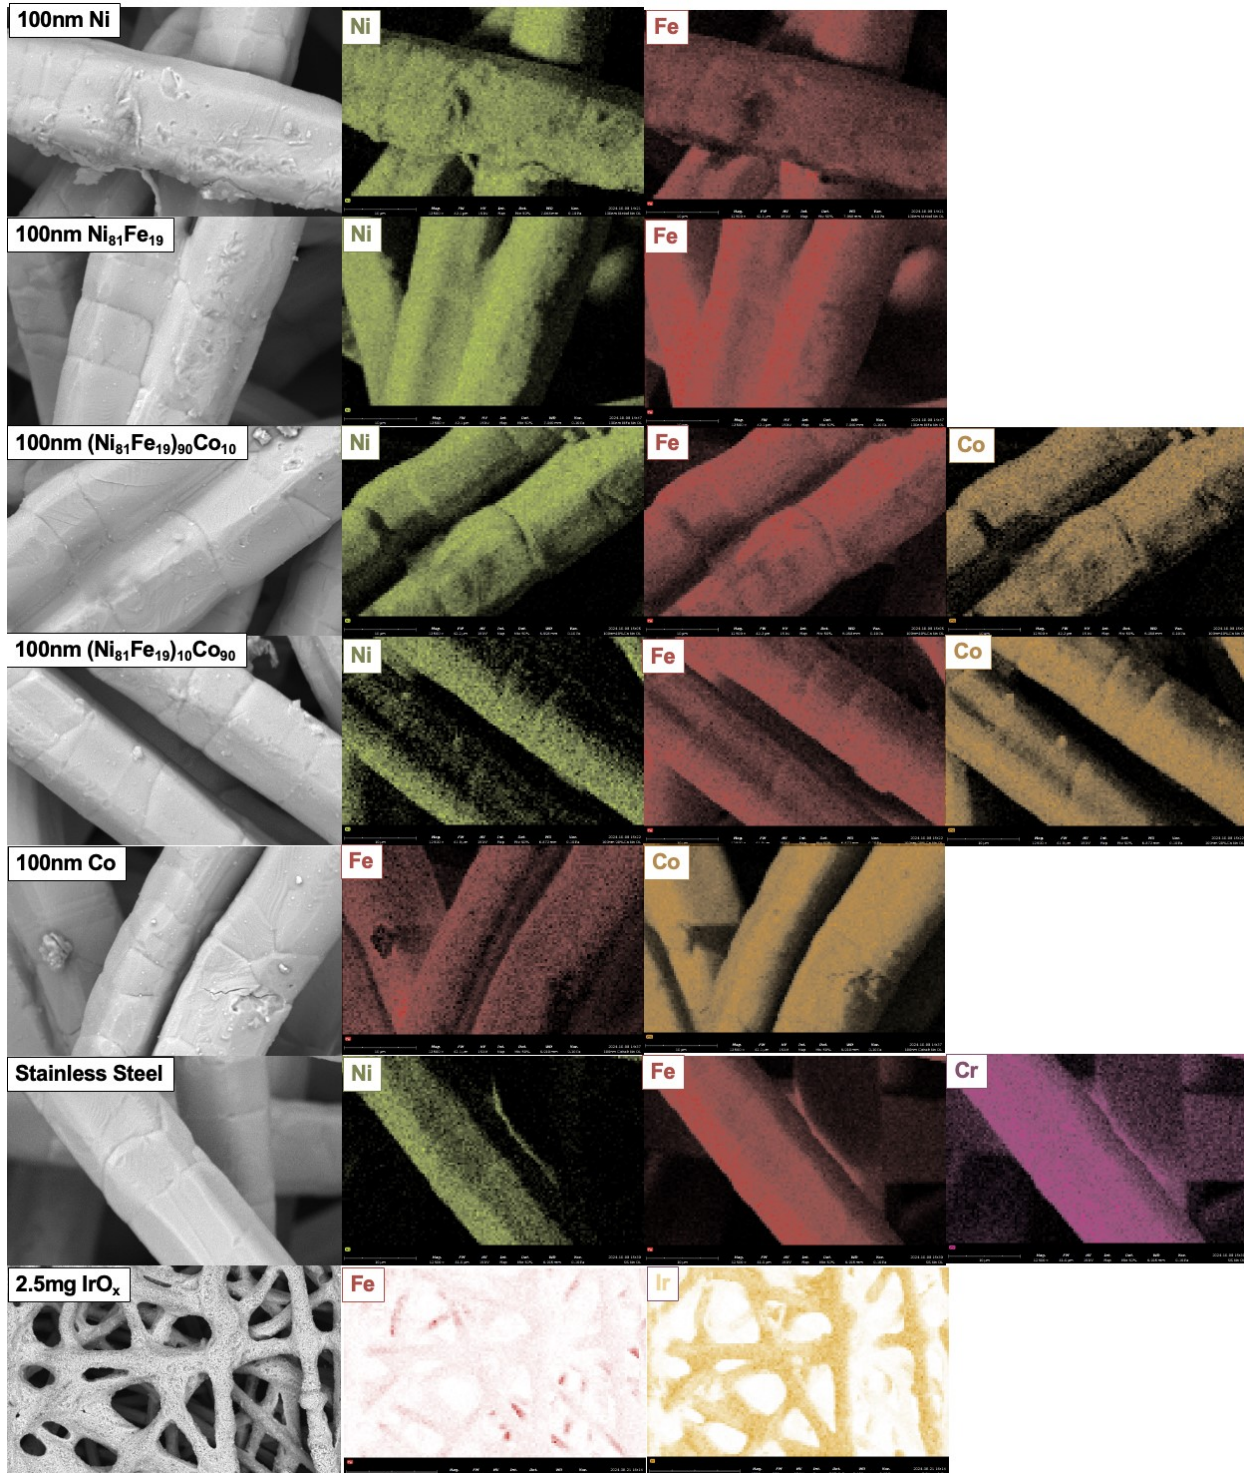

**Figure S3. SEM images and EDS elemental maps of catalyst-coated PTLs and controls.** a–g, Secondary-electron SEM (left) and corresponding EDS maps (Ni in green, Fe in red, Co in gold, Cr in magenta or Ir in yellow) for (a) 100 nm Ni, (b) 100 nm Ni<sub>81</sub>Fe<sub>19</sub>, (c) 100 nm (Ni<sub>81</sub>Fe<sub>19</sub>)<sub>10</sub>Co<sub>90</sub>, (d) 100 nm (Ni<sub>81</sub>Fe<sub>19</sub>)<sub>90</sub>Co<sub>10</sub>, (e) 100 nm Co, (f) bare stainless-steel PTL, and (g) 2.5 mg cm<sup>-2</sup> IrO<sub>x</sub> nanoparticles. All PVD-deposited films uniformly coat the porous steel fibers with homogeneous elemental distribution, whereas the uncoated PTL exhibits only Cr and Fe signals and the IrO<sub>x</sub> sample displays discrete Ir-rich agglomerates.

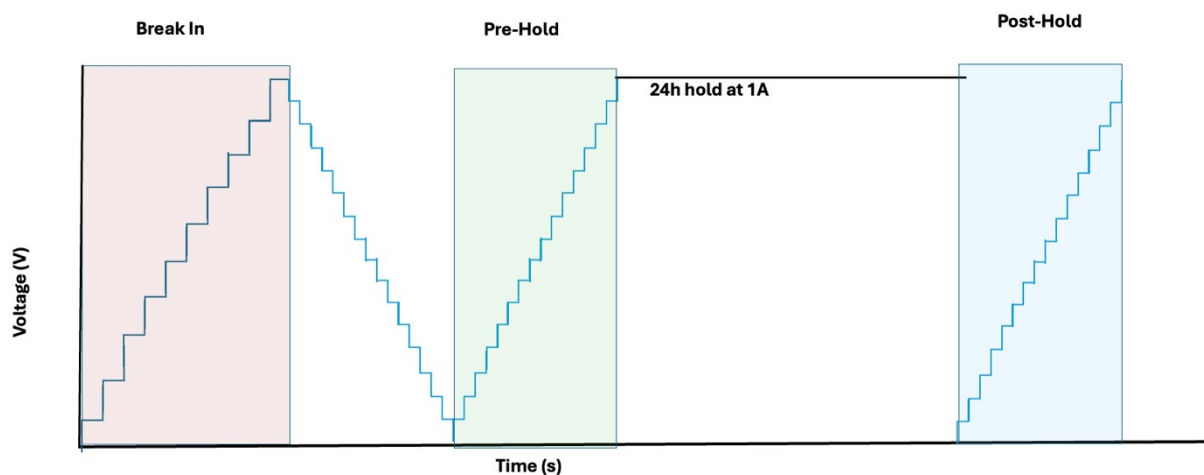

**Figure S4. Electrochemical Schematic**

An electrochemical sequence was applied at 50 °C with 60 mL min<sup>-1</sup> feed: (i) Break-in (red shading), a staircase polarization from 0 to 1 A cm<sup>-2</sup> in 100 mA cm<sup>-2</sup> increments followed immediately by a reverse staircase back to 50 mA cm<sup>-2</sup>; (ii) Pre-hold polarization (green shading), a repeat staircase from 50 mA to 1 A cm<sup>-2</sup> to establish the baseline polarization curve; (iii) 24 h galvanostatic hold at 1 A cm<sup>-2</sup> (black line), after which (iv) Post-hold polarization (blue shading) repeats the staircase from 50 mA to 1 A cm<sup>-2</sup> to quantify voltage change over time and post-stability performance. Continuous voltage measurements were recorded at each current step.

## Additional Data

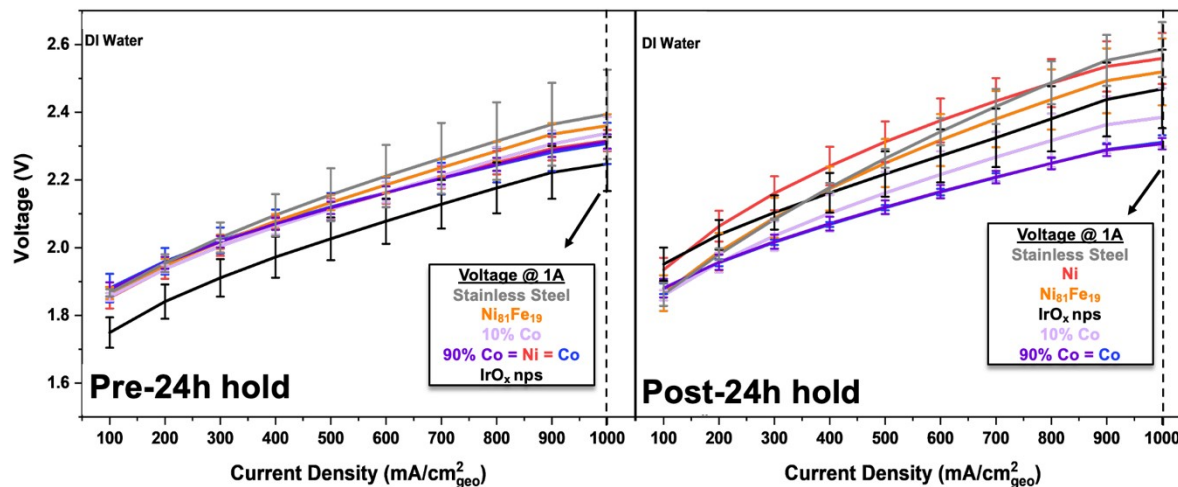

Figure S5. Pre- and post-24 h stability polarization curves in DI water-fed AEMWEs.

Average voltage current density relationships ( $100\text{--}1000\text{ mA cm}^{-2}\text{_{geo}}$ ,  $n = 3$ ) are shown for stainless-steel PTL (grey), Ni (red),  $\text{Ni}_{81}\text{Fe}_{19}$  (orange),  $\text{IrO}_x$  nanoparticles (black), 10 % Co (purple) and 90 % Co (blue) thin-film anodes. Left: “Pre-24 h hold” polarization curves recorded immediately after the break-in protocol. Right: “Post-24 h hold” curves recorded following a 24 h galvanostatic hold at  $1\text{ A cm}^{-2}$ . The dashed vertical line at  $1000\text{ mA cm}^{-2}\text{_{geo}}$  denotes the  $1\text{ A cm}^{-2}$  endpoint; inset boxes list the corresponding voltages at this current density for each catalyst.

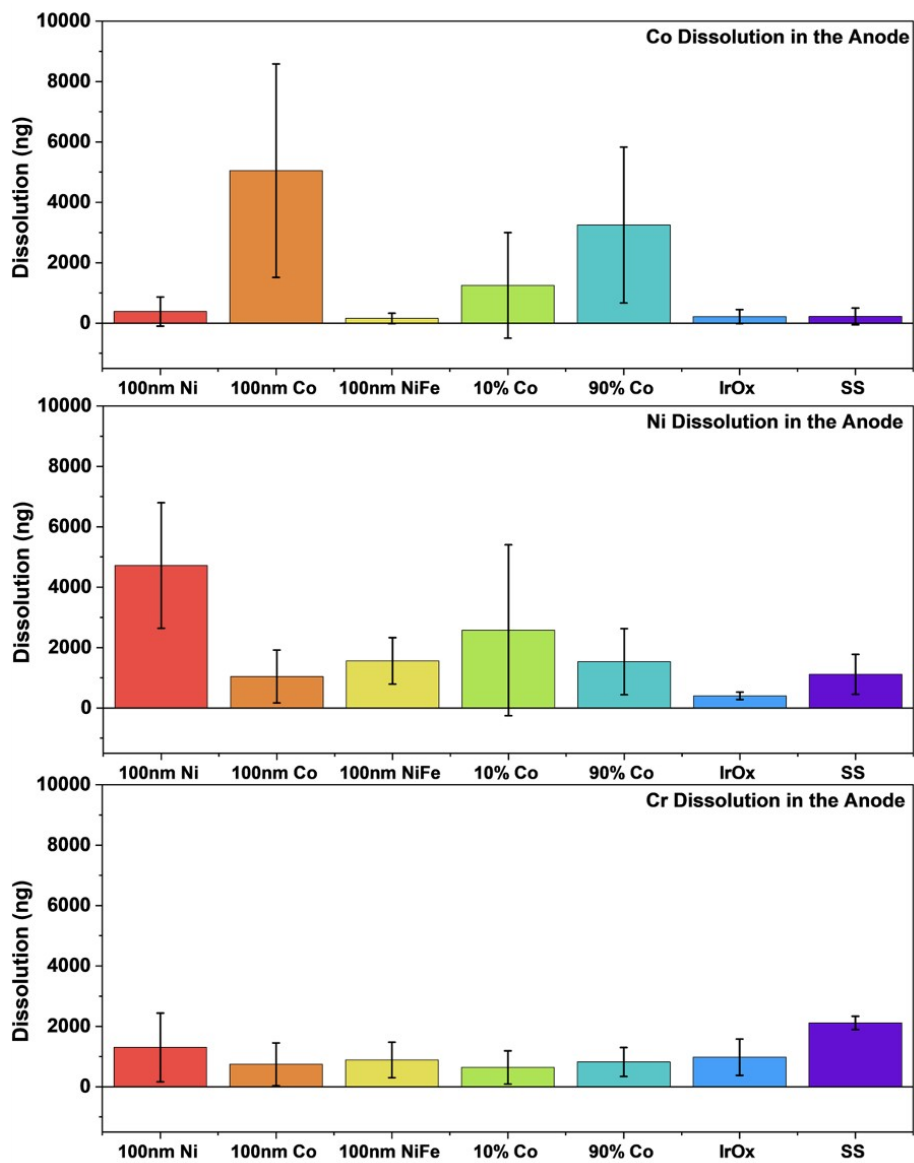

Figure S6. Quantified metal dissolution from anode catalyst layers after 24 h at  $1 \text{ A cm}^{-2}$  in DI water.

Top panel shows Co, middle panel Ni, and bottom panel Cr dissolved (ng) from 100 nm Ni, 100 nm Co, 100 nm Ni<sub>81</sub>Fe<sub>19</sub>, 10 % Co, 90 % Co, 2.5 mg cm<sup>-2</sup> IrO<sub>x</sub>, and bare stainless-steel (SS) PTLs. Bars represent the mean  $\pm$  SD of three independent MEAs, with the stainless-steel control blank ( $\sim$ 1 ppb Ni threshold) subtracted.

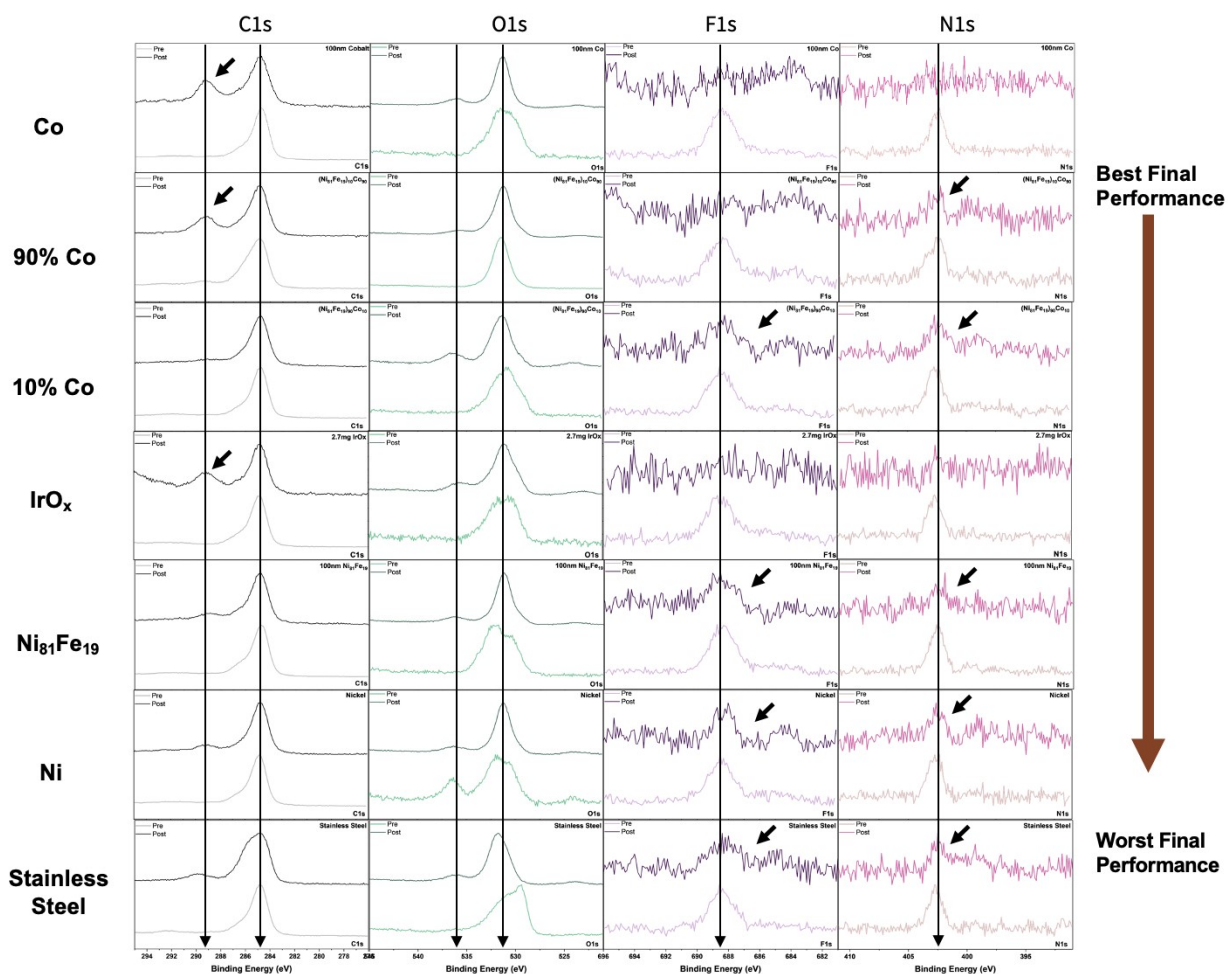

Figure S7. XPS of ionomer and catalyst surfaces before and after 24 h stability testing.

Rows, from top to bottom, correspond to the anode catalysts ordered by decreasing final performance (best at top: Co, 90 % Co, 10 % Co; mid: IrO<sub>x</sub>, Ni<sub>81</sub>Fe<sub>19</sub>; worst at bottom: Ni, stainless-steel PTL). Columns show the C 1s (left), O 1s, F 1s and N 1s (right) regions, with each spectrum overlaid “Pre” (light line) and “Post” (darker line) the 24 h hold at 1 A cm<sup>-2</sup>. Vertical guide lines mark the principal binding energies: C=C (~284.8 eV), C–O (~286.5 eV), C=O (~288.5 eV), O 1s oxide (~531.5 eV), F 1s (~689 eV) and N 1s (~399 eV). Black arrows highlight the growth of the C=O shoulder in C 1s and the emergence or attenuation of F 1s and N 1s peaks from ionomer degradation.

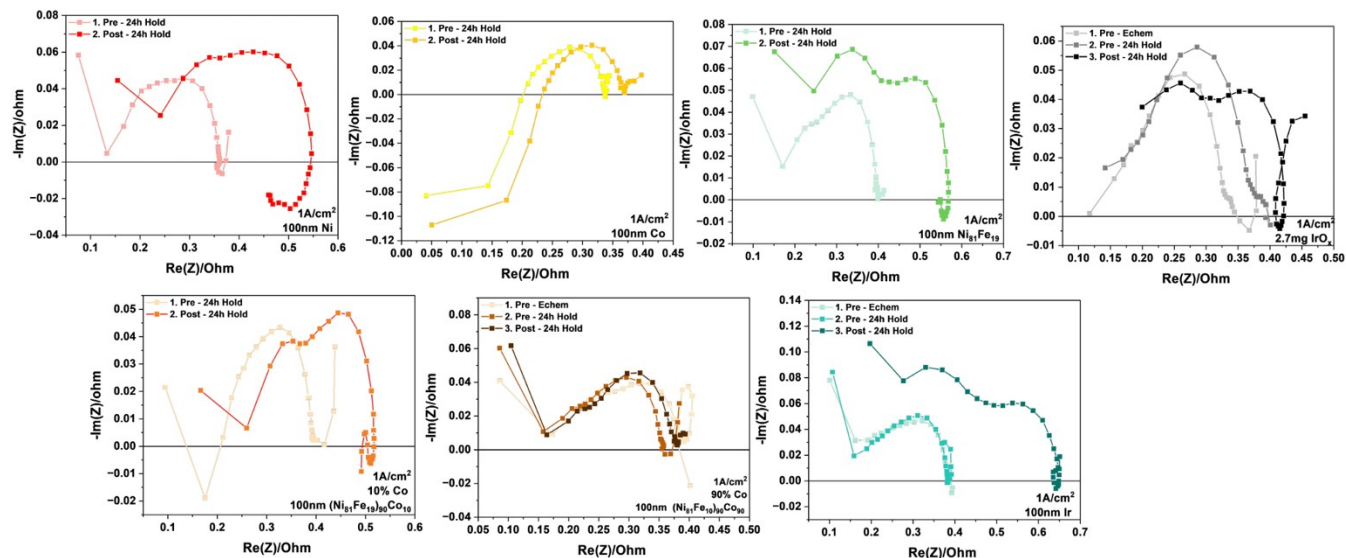

Figure S8. Raw galvanostatic electrochemical impedance spectroscopy (GEIS) Nyquist plots for each anode catalyst at  $1 \text{ A cm}^{-2}$ .

Panels show  $-\text{Im}(Z)$  vs  $\text{Re}(Z)$  for (a) 100 nm Ni, (b) 100 nm Co, (c) 100 nm  $\text{Ni}_{81}\text{Fe}_{19}$ , (d)  $2.5 \text{ mg cm}^{-2}$   $\text{IrO}_x$  nanoparticles, (e) 100 nm  $(\text{Ni}_{81}\text{Fe}_{19})_{10}\text{Co}_{90}$ , (f) 100 nm  $(\text{Ni}_{81}\text{Fe}_{19})_{90}\text{Co}_{10}$  and (g) 100 nm Ir (see colour legend). Light markers correspond to data recorded immediately before the 24 h stability hold (“Pre-24 h”), and dark markers to data recorded immediately after (“Post-24 h”); panels (c) and (d) additionally include the initial “Pre-Echem” response (grey). The decrease in semicircle diameter from light to dark traces for Co-rich alloys indicates a smaller increase in charge-transfer resistance during the 24 h hold compared to Ni-rich films.
